# Supplementary material
Source: HighWire-hosted journal article supplement (https://gut.bmj.com/content/69/9/1677)

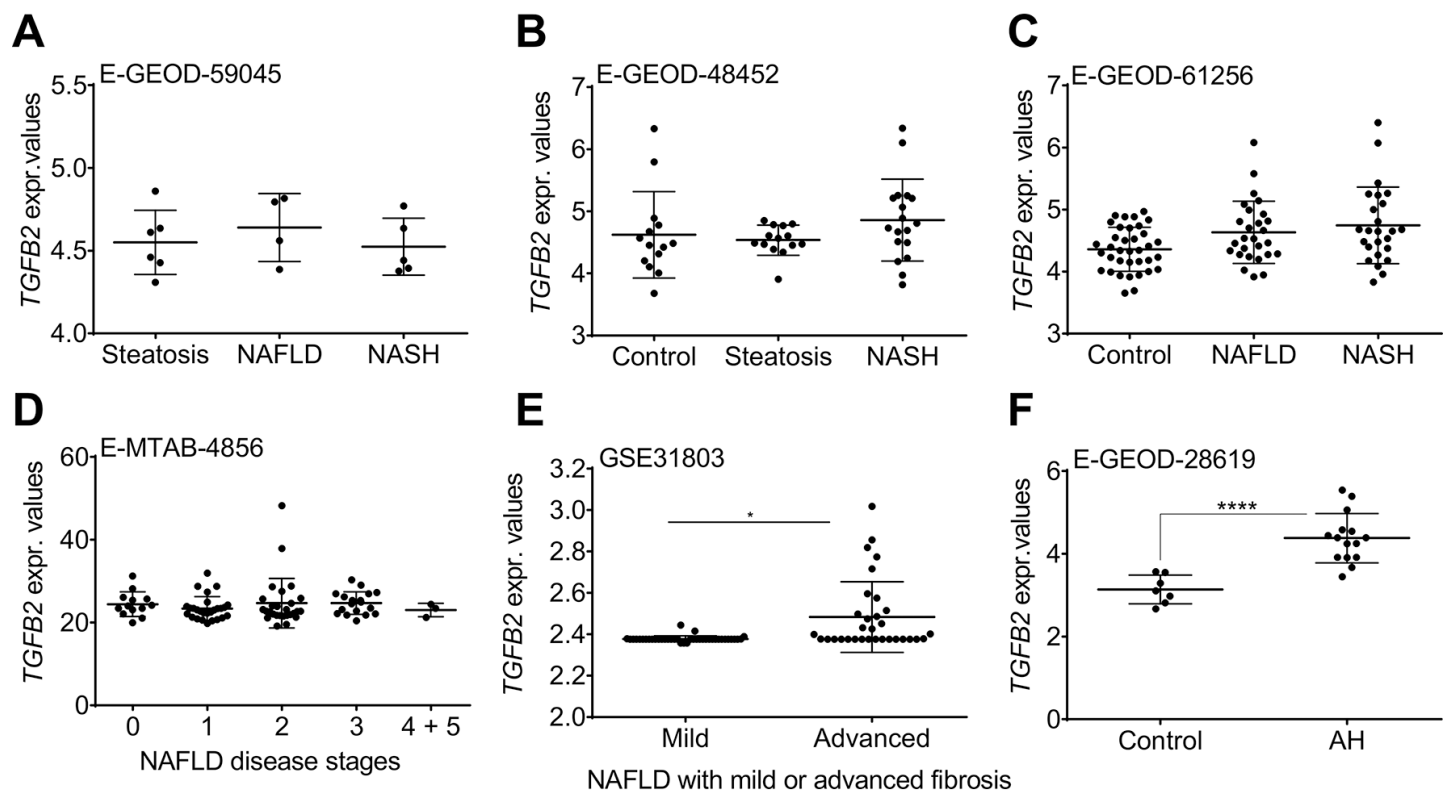

Supplement: inline-supplementary-material-3 [file inline-supplementary-material-3.pdf]

**A**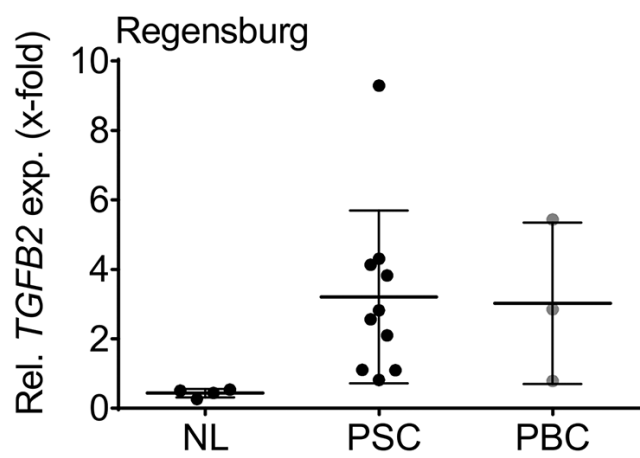**B**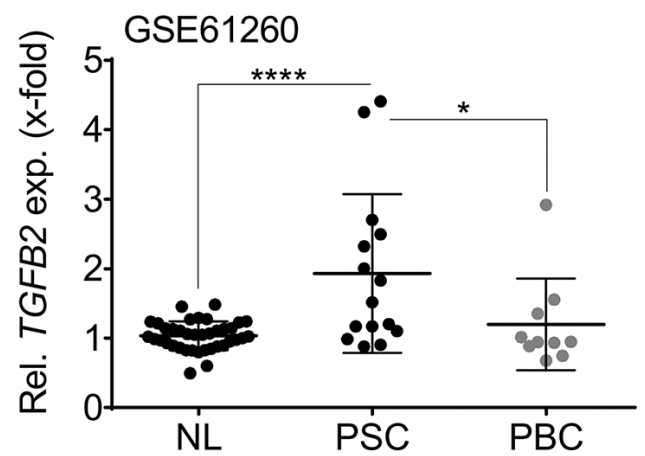

Supplement: inline-supplementary-material-4 [file inline-supplementary-material-4.pdf]

## Supplemental Figure 5

**A**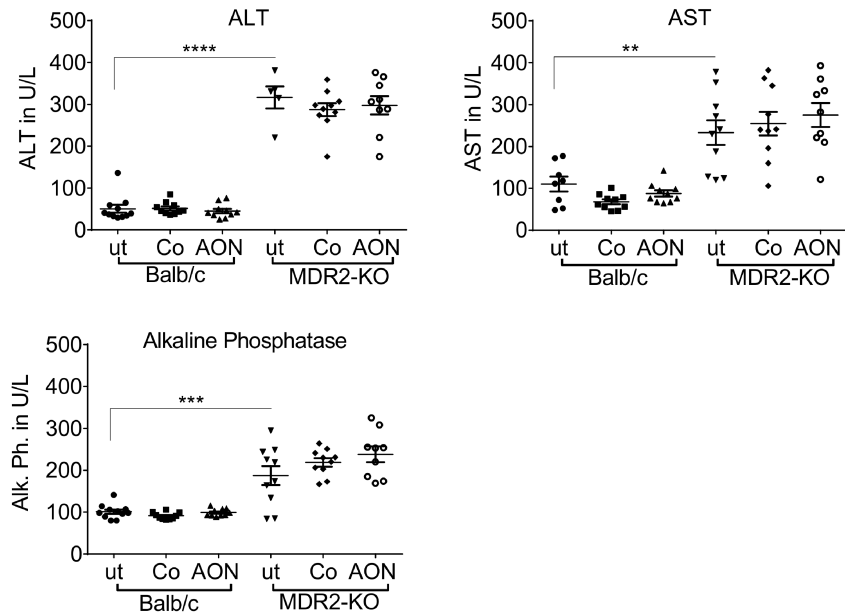**B**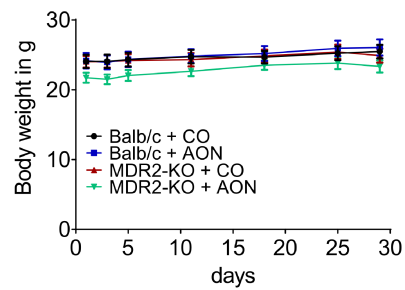

Supplement: inline-supplementary-material-6 [file inline-supplementary-material-6.pdf]

Supplemental Figure 7

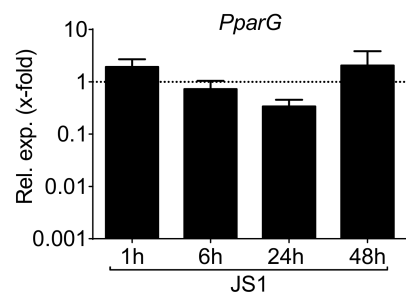

Supplement: inline-supplementary-material-8 [file inline-supplementary-material-8.pdf]

## Supplemental Figure 8

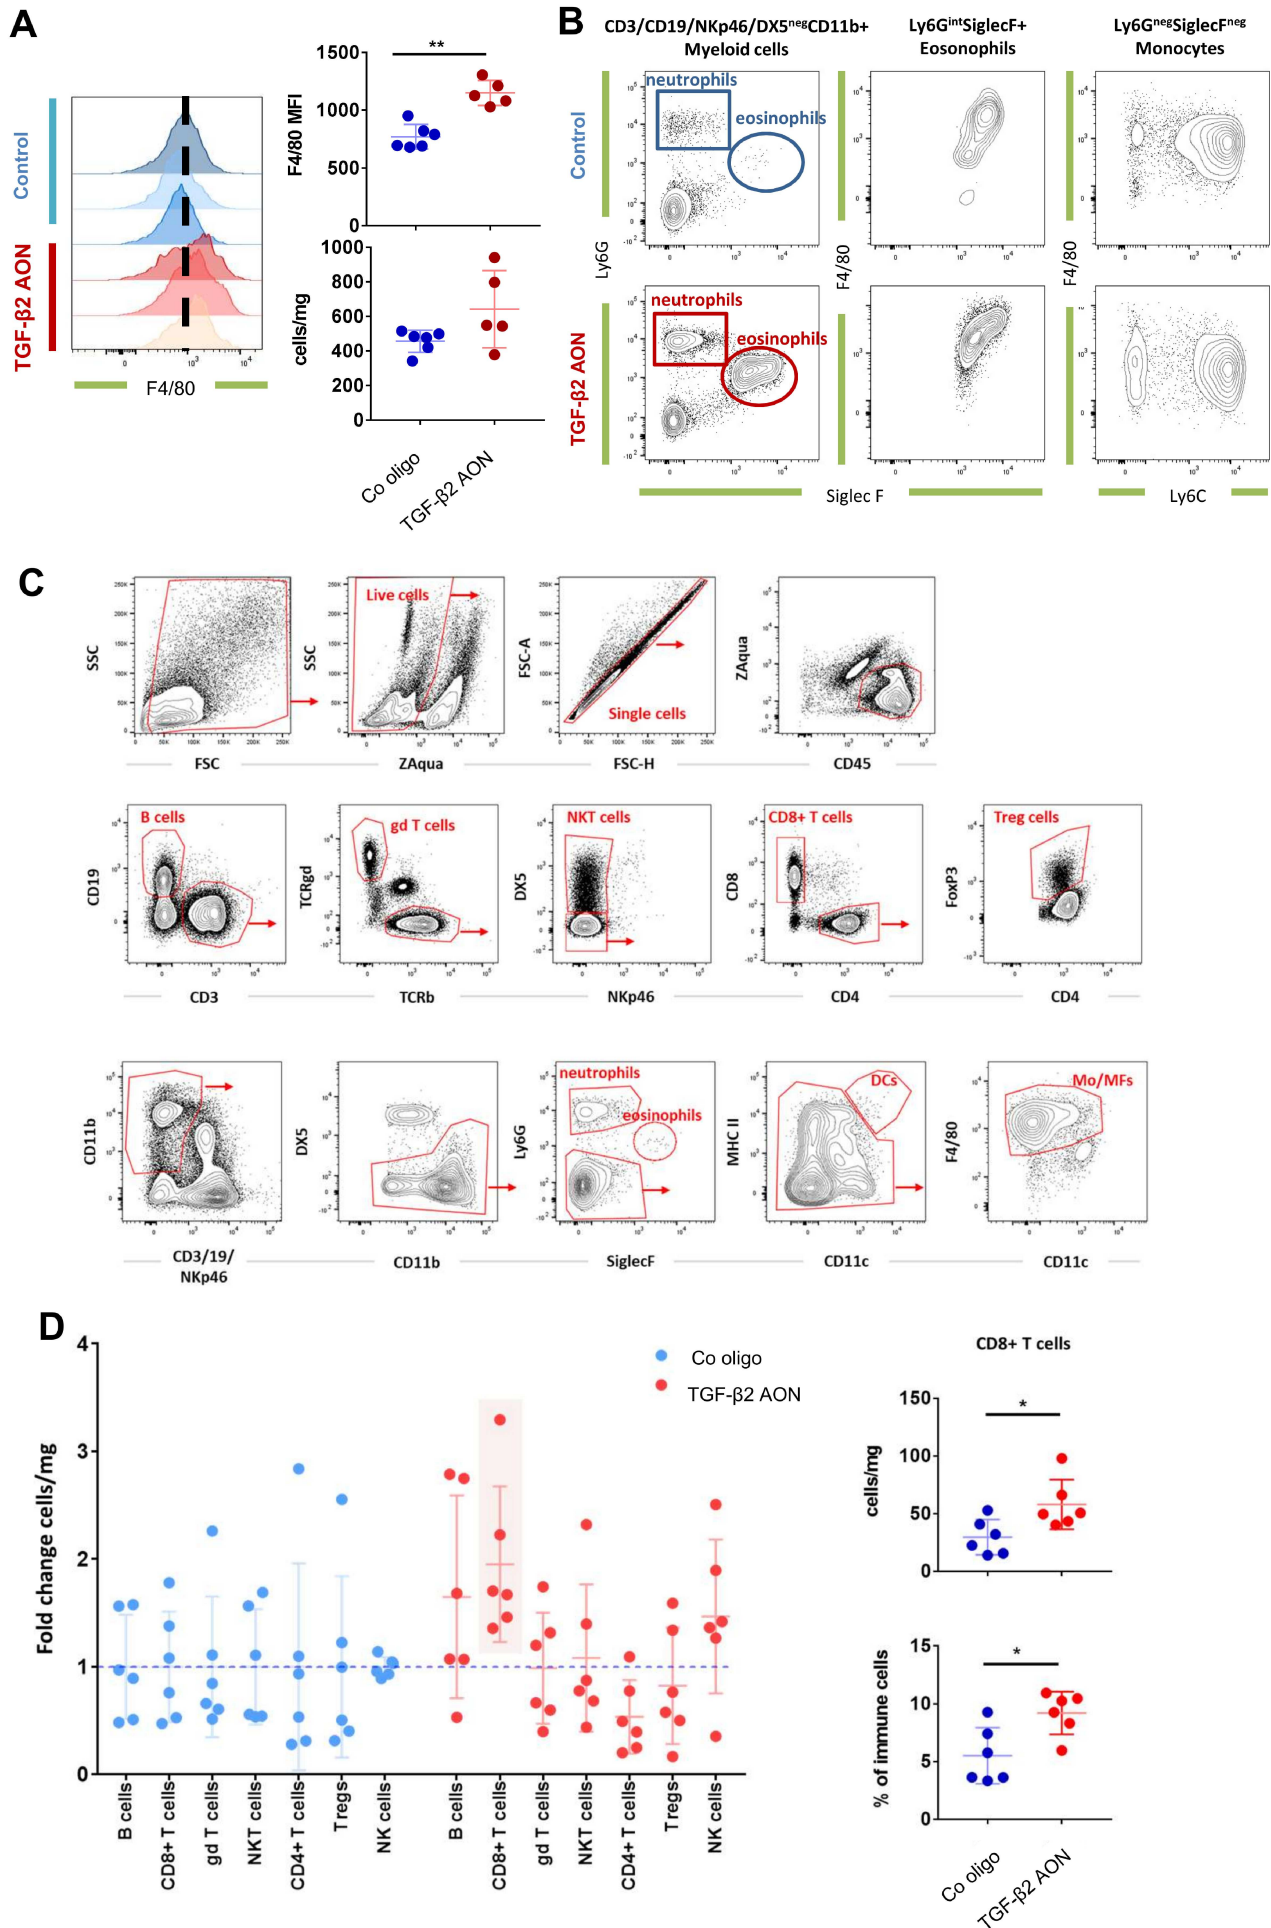

Supplement: inline-supplementary-material-9 [file inline-supplementary-material-9.pdf]
